# Supplementary material
Source: Springer Nature journal article supplement (https://www.springermedizin.de/resource/supplementary/13102_2011_77_MOESM4_ESM.pdf/9667680)

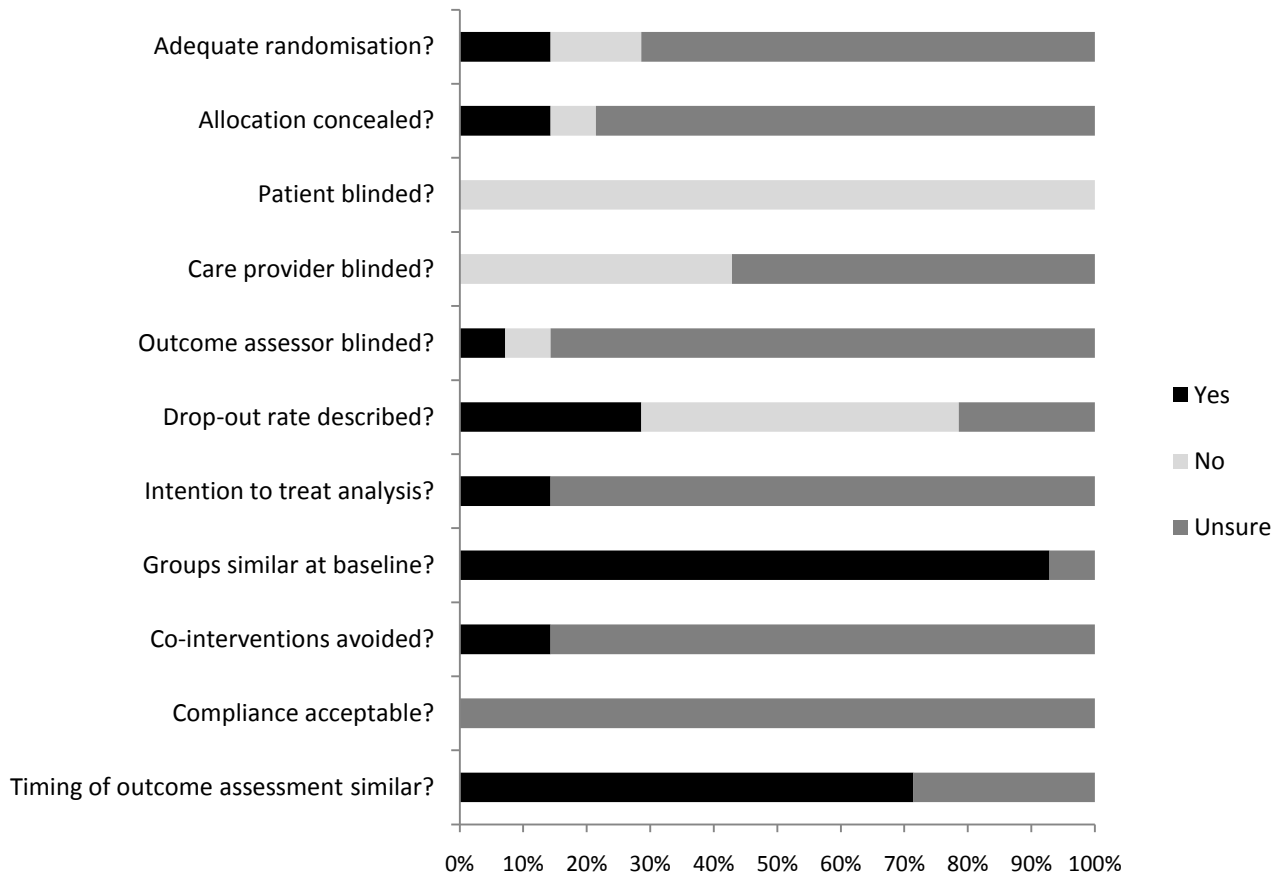

Supplement: MOESM4 [file 9667680]
